## RESEARCH ARTICLE

# Characterization of a proteomic profile associated with organ dysfunction and mortality of sepsis and septic shock

Adolfo Ruiz-Sanmartín<sup>1,2,3</sup>, Vicent Ribas<sup>4</sup>, David Suñol<sup>4</sup>, Luis Chiscano-Camón<sup>1,2,3</sup>, Clara Palmada<sup>1,2</sup>, Iván Bajaña<sup>1,2</sup>, Nieves Larrosa<sup>5,6,7</sup>, Juan José González<sup>5,6,7</sup>, Núria Canela<sup>8</sup>, Ricard Ferrer<sup>1,2,3</sup>, Juan Carlos Ruiz-Rodríguez<sup>1,2,3\*</sup>

**1** Department of Intensive Care, Vall d'Hebron University Hospital, Vall d'Hebron Barcelona Hospital Campus, Barcelona, Spain, **2** Shock, Organ Dysfunction and Resuscitation (SODIR) Research Group, Vall d'Hebron Research Institute, Barcelona, Spain, **3** Departament de Medicina, Universitat Autònoma de Barcelona, Barcelona, Spain, **4** Eurecat, Centre Tecnològic de Catalunya, Digital Health Unit, Barcelona, Spain, **5** Department of Clinical Microbiology, Vall d'Hebron University Hospital, Vall d'Hebron Barcelona Hospital Campus, Barcelona, Spain, **6** Department of Genetics and Microbiology, Universitat Autònoma de Barcelona, Barcelona, Spain, **7** CIBERINFEC, ISCIII–CIBER de Enfermedades Infecciosas, Instituto de Salud Carlos III, Madrid, Spain, **8** Eurecat, Centre Tecnològic de Catalunya, Centre for Omic Sciences (COS), Joint Unit URV-EURECAT, Unique Scientific and Technical Infrastructures (ICTS), Reus, Spain

\* [jcruiz@vhebron.net](mailto:jcruiz@vhebron.net)

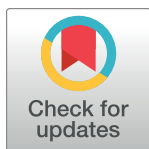

## OPEN ACCESS

**Citation:** Ruiz-Sanmartín A, Ribas V, Suñol D, Chiscano-Camón L, Palmada C, Bajaña I, et al. (2022) Characterization of a proteomic profile associated with organ dysfunction and mortality of sepsis and septic shock. PLoS ONE 17(12): e0278708. <https://doi.org/10.1371/journal.pone.0278708>

**Editor:** Jon M. Jacobs, Pacific Northwest National Laboratory, UNITED STATES

**Received:** July 17, 2022

**Accepted:** November 21, 2022

**Published:** December 2, 2022

**Copyright:** © 2022 Ruiz-Sanmartín et al. This is an open access article distributed under the terms of the [Creative Commons Attribution License](https://creativecommons.org/licenses/by/4.0/), which permits unrestricted use, distribution, and reproduction in any medium, provided the original author and source are credited.

**Data Availability Statement:** Data cannot be shared publicly because data contain potentially identifying or sensitive patient information. Data are available from the Clinical Research Ethics Committee of Vall d'Hebron University Hospital ([ceic@vhir.org](mailto:ceic@vhir.org)) for researchers who meet the criteria for access to confidential data.

**Funding:** This study has been funded by Eurecat 2017 Research Projects (Health Forecast 2.0. Omic stratification of patients with sepsis and septic

## Abstract

### Introduction

The search for new biomarkers that allow an early diagnosis in sepsis and predict its evolution has become a necessity in medicine. The objective of this study is to identify, through omics techniques, potential protein biomarkers that are expressed in patients with sepsis and their relationship with organ dysfunction and mortality.

### Methods

Prospective, observational and single-center study that included adult patients ( $\geq 18$  years) who were admitted to a tertiary hospital and who met the criteria for sepsis. A mass spectrometry-based approach was used to analyze the plasma proteins in the enrolled subjects. Subsequently, using recursive feature elimination classification and cross-validation with a vector classifier, an association of these proteins with mortality and organ dysfunction was established. The protein-protein interaction network was analyzed with String software.

### Results

141 patients were enrolled in this study. Mass spectrometry identified 177 proteins. Of all of them, and by recursive feature elimination, nine proteins (GPX3, APOB, ORM1, SERPINF1, LYZ, C8A, CD14, APOC3 and C1QC) were associated with organ dysfunction (SOFA > 6) with an accuracy of  $0.82 \pm 0.06$ , precision of  $0.85 \pm 0.093$ , sensitivity  $0.81 \pm 0.10$ , specificity  $0.84 \pm 0.10$  and AUC  $0.82 \pm 0.06$ . Twenty-two proteins (CLU, LUM, APOL1, SAA1, CLEBC3B, C8A, ITIH4, KNG1, AGT, C7, SAA2, APOH, HRG, AFM, APOE, APOC1, C1S, SERPINC1, IGFALS, KLKB1, CFB and BTB) were associated with mortality with an

shock). The funders had no role in study design, data collection and analysis, decision to publish, or preparation of the manuscript.

**Competing interests:** The authors have declared that no competing interests exist.

accuracy of  $0.86 \pm 0.05$ , a precision of  $0.91 \pm 0.05$ , a sensitivity of  $0.91 \pm 0.05$ , a specificity of  $0.72 \pm 0.17$ , and an area under the curve (AUC) of  $0.81 \pm 0.08$  with a confidence interval of 95%.

## Conclusion

In sepsis there are proteomic patterns associated with organ dysfunction and mortality.

## Introduction

Sepsis is known as the clinical syndrome of life-threatening dysfunction caused by a dysregulated host response to infection. The severity of sepsis varies significantly with the response and the degree of organ dysfunction. Severe cases of sepsis in which hypotension continues despite adequate fluid replacement, are classified as septic shock [1], which has a mortality rate of around 20–40% [2, 3].

For decades, various biomarkers have been detected and studied that, not only allow an early diagnosis of sepsis, but can also predict the evolution and mortality of these patients. Initially, among them, C-reactive protein (CRP), procalcitonin (PCT), interleukin-6 (IL-6), have been postulated as diagnostic and prognostic biomarkers in sepsis, although with limitation. Plasma CRP and IL-6 concentration is positively correlated with the risk of organ dysfunction and death [4, 5]. Both, however, cannot accurately reflect the severity of infection and sepsis because they may increase during minor infection or remains high even after the time course of infection, as well as increasing during an inflammatory response to noninfectious events, trauma, tumorigenesis or surgical interventions [6–8]. PCT is, probably, the marker that best meets the requirements of a biomarker for infection at present and has even been postulated as a prognostic factor for the evolution of sepsis [9] as well as a guide in the duration of antibiotic treatment [10]. However, various factors, including the time of evolution of sepsis or the presence of renal failure, can cause a loss of confidence when its determination is made in isolation [11, 12]. Other biomarkers such as preseptin or pro-adrenomedullin (pro-ADM) have also been postulated as promising biomarkers in sepsis [13, 14].

In recent years, different technologies such as genomics, epigenetics, transcriptomics, proteomics, and metabolomics have been used to investigate the pathogenesis of sepsis. The role of omics technologies in this field is to find biomarkers that differentiate infectious from non-infectious inflammation, to find biomarkers that predict clinical outcome and offer the possibility of therapy for sepsis, and to discover biomarkers that can predict patient response to therapy. Of all of them, proteomics is perhaps the omics methodology that has aroused the most expectations in the field of medicine in general and, in that of infectious diseases, in particular. Its objective is the systematic and large-scale analysis of the proteome (the set of all the proteins expressed by the genome of a cell, tissue, or organ) at a given moment and under certain conditions of time and environment, resulting in biomarker molecules for numerous diseases, since they are involved in most cellular physiological, and pathological processes [15, 16]. Compared to other immunological tests, proteomic is a method that has the advantages of high throughput, sensitivity, and specificity. The development of these techniques has provided important means for studying cellular processes, such as cell signaling, the identification of protein modifications, and the characterization of specific biological markers [16].

This study hypothesizes that there may be proteomic profiles associated with organ dysfunction and sepsis mortality. The objective of this study is to identify potential protein

biomarkers that are expressed in patients admitted to a tertiary hospital with a diagnosis of sepsis, their role in the process and their relationship with organ dysfunction and mortality.

## Material and methods

### Study design and ethical approval

This prospective, observational, single-center study enrolled consecutive patients from across hospital departments (emergencies, wards, and Intensive Care Unit) who met the criteria for the activation of the Vall d'Hebron University Hospital intra-hospital sepsis code (ISC) [17] between April and 2016 and January 2018. The study was approved by the Clinical Research Ethics Committee of Vall d'Hebron University Hospital [PR (AG) 11–2016, PR (AG) 336–2016, PR (AG) 210/2017] and written informed consent was obtained from all participants. The study complied in full with the General Data Protection Regulation (GDPR) (Regulation (EU) 2016/679) was performed in accordance with the ethical standards laid down in the 1964 Declaration of Helsinki and its later amendments.

### Inclusion and exclusion criteria

The inclusion criteria followed the Sepsis 2 criteria for the diagnosis of sepsis, established at the time of the study [18]. They included adult patients  $\geq 18$  years of age presenting with either a suspected or documented infection with the presence of at least one of the two following sets of variables, as outlined by ISC: (1) an acute alteration in the level of consciousness not explained by other clinical conditions, or (2) the presence of hyperthermia (axillary temperature  $> 38.3^{\circ}\text{C}$ ) or hypothermia (axillary temperature  $< 36, 0^{\circ}\text{C}$ ), and/or tachycardia ( $> 110$  beats per minute), tachypnea ( $> 30$  breaths per minute) or desaturation ( $\text{SpO}_2 < 90\%$ ), as well as arterial hypotension (systolic blood pressure  $< 90$  mmHg or mean arterial pressure  $< 65$  mmHg, or  $> 40$  mmHg decrease in baseline systolic blood pressure). These patients were subsequently classified into 2 independent groups: 1) group of survivors/non-survivors and 2) group of patients according to their organ dysfunction with a SOFA cut-off point  $> 6$ . Exclusion criteria included non-adult patients, pregnant women, or patients in whom a blood sample or written informed consent could not be obtained.

### Data collection and biomarker measurements

Patient comorbidities and demographics were subsequently noted upon sepsis code activation, as well as data concerning triage, routine laboratory values, microbiology testing and final clinical diagnosis. Clinical scores (SOFA) were calculated within the first 24h of inclusion of the patient in the study. The worst calculated for each patient was taken as the final value. Of the eligible patients, a venous or arterial blood sample was obtained from all patients at the time of the initial visit as well as a sample for microbiological cultures. PCT [chemiluminescent immunoassay (CLIA)], PCR (immunoturbidimetric test) and lactate determinations (enzymatic color test) were performed on these samples. The samples obtained were frozen at  $-80^{\circ}\text{C}$  and stored in a Sepsis Bank of the Vall d'Hebron University Hospital Biobank for later analysis, following the protocols of the clinical laboratories. A subgroup analysis was performed based on mortality and organ dysfunction.

### Protein study

The proteomic study was performed from plasma samples collected in Vacutainer K2E EDTA tubes (Becton Dickinson-Plymouth, United Kingdom) by the Proteomics and Metabolomics

Area of the Center for Omic Sciences (COS), a Joint Unit between Rovira I Virgili University and Eurecat (Reus, Spain)

### Protein extraction and quantification

Prior to proteomic analysis, depletion of the seven most abundant plasma proteins (albumin, IgG, antitrypsin, IgA, transferrin, haptoglobin, and fibrinogen) was performed to increase the number of identified/quantified proteins. Therefore, 12  $\mu$ l of each sample was passed twice through the Agilent Technologies Human-7 Multiple Affinity Removal Spin (MARS) cartridge and flow-through fractions were collected for proteomic analysis following the manufacturer's protocol. Flow-through fractions were concentrated, and buffer was exchanged to approximately 100  $\mu$ l of 6 M urea in 50 mM ammonium bicarbonate (ABC) using 5K MWCO spin columns (Agilent 5185–5991).

### Protein digestion and peptide 10-plex TMT labeling

Thirty micrograms of total protein (quantified by Bradford's method) were reduced with 4mM 1,4-Dithiothreitol (DTT) for 1h at 37°C and alkylated with 8 mM iodoacetamide (IAA) for 30 min at 25°C in the dark. Afterwards, samples were overnight digested (pH 8.0, 37°C) with sequencing-grade trypsin (Promega) at enzyme: protein ratio of 1:50. Digestion was quenched by acidification with 1% (v/v) formic acid and peptides were desalted on Oasis HLB SPE column (Waters) before TMT 10-plex labelling (Thermo Fisher) following manufacturer instructions.

To normalize all samples in the study along the different TMT-multiplexed batches used, a pool containing all the samples was labelled with a TMT-126 tag and included in each TMT batch. The different TMT 10-plex batches were desalted on Oasis HLB SPE columns before the nanoLC-MS analysis.

### nanoLC-(Orbitrap)MS/MS analysis

Labelled and multiplexed peptides were loaded on a trap nano-column (100  $\mu$ m I.D.; 2cm length; 5 $\mu$ m particle diameter, Thermo Fisher Scientific, San José, CA, USA) and separated onto a C-18 reversed phase (RP) nano-column (75 $\mu$ m I.D.; 15cm length; 3 $\mu$ m particle diameter, Nikkyo Technos Co. LTD, Japan) on an EASY-II nanoLC from Thermo Fisher. The chromatographic separation was performed with a 180 min gradient using Milli-Q water (0.1% formic acid) and acetonitrile (0.1% formic acid) as mobile phase at a flow rate of 300 nL/min.

Mass spectrometry analyses were performed on an LTQ-Orbitrap Velos Pro from Thermo Fisher by an enhanced FT-resolution MS spectrum ( $R = 30,000$  FHMW) followed by a data dependent FT-MS/MS acquisition ( $R = 15,000$  FHMW, 40% HCD) from the most intense ten parent ions with a charge state rejection of one and dynamic exclusion of 0.5 min.

### Protein identification/quantification

Protein identification/quantification was performed on Proteome Discoverer software v.1.4.0.288 (Thermo Fisher). For protein identification, all MS and MS/MS spectra were analyzed using Mascot search engine (v.2.5). Mascot was set up to search SwissProt\_2018\_03.fasta database (557012 entries), restricting for Human taxonomy (20317 sequences) and assuming trypsin digestion. Two missed cleavages were allowed and an error of 0.02 Da for FT-MS/MS fragmentation mass and 10.0 ppm for a FT-MS parent ion mass were allowed. TMT-10plex was set as quantification modification and oxidation of methionine and acetylation of N-termini were set as dynamic modifications, whereas carbamidometylation of

cysteine was set as static modifications. The false discovery rate (FDR) and protein probabilities were calculated by Perclorator. For protein quantification, the ratios between each TMT-label against 126-TMT label were used and quantification results were normalized based on protein median. The results are a ratio of reporter ions abundance and are dimensionless.

## Statistics analysis

Demographic, clinical and laboratory data were reported as mean  $\pm$  standard deviation (SD) or median with interquartile range (IQR) as appropriate, and categorical variables as numbers and percentages. The statistical analysis was performed using the SPSS 18.0 software (SPSS Inc., Chicago, IL, USA).

In the proteomic study, before any statistical analysis was performed, each protein was standardized and missing values were imputed using the KNN method for proteins that were less than 25% missing. Proteins with major unassignment were censored from the study. The Mann-Whitney U test ( $p < 0.05$ ) was used to test differences between distributions. The Benjamini-Hochberg procedure was applied to control the false discovery rate (FDR). Statistical analyzes were performed in Python 3.8 using the pandas, sklearn, spicy, and statsmodels libraries.

## Protein selection

Protein selection was performed in three steps. In the first step, the data was divided into training and test sets containing, respectively, 80% and 20% of the data. Any variable containing more than 25% of missing values (65 of 177) was removed. After that, the variables were standardized with a z-score, which was fitted with the train data and applied to both the training and test sets. Missing values were imputed using the k-nearest neighbor (KNN) method, which was fitted to the train data and applied to both the train and the test sets. Finally, recursive feature elimination (RFE) classification was applied in logistic regression with a cross-validated classifier for organ dysfunction or mortality. This method was executed with 10-fold cross validation, adding each result, and finally ranking each protein according to its elimination rate.

In a second step, 60 protein lists were created—the first list containing only the first ranking protein, the second with the two best ranking proteins, and so on—and evaluated with 100-fold cross validation with a support vector classifier (SVC) taking as performance metrics the accuracy, precision, recovery, the harmonic mean of precision and sensitivity (F1 score) and area under the curve (AUC). For each protein list, we report the mean of 100 loops and the spread of the Accuracy, Precision, Recovery, F1 score, and AUC to select the best protein list over which the classification model shall be developed. The significance of the resulting classifier was tested with the permutation test score with the package scikit-learn 1.0.2 implemented in Python.

The impact of the protein on organ dysfunction and mortality was performed through the extraction of the SVC of maximum similarity (that is, we extracted the single SVC closest to the mean of the results obtained in the 100 experiments executed). The coefficients of our SVC were analyzed through their additive Shapley explanations (shape values in summary), in such a way that proteins that presented a positive shap value were associated with higher organ dysfunction. Regarding mortality, negative shap values are associated with higher mortality. The strength of association between the shap value and the outcome (organ dysfunction and mortality) is measured by the magnitude of these shap value.

Protein selection was performed in Python 3.8 using the standard libraries pandas and scikit-learn. The protein-protein interaction network was analyzed with String v 11.0b software (<https://string-db.org/>).

## Results

### Characteristics of the study population

A total of 141 patients were included in this study. The demographic and clinical data of the patients are shown in Table 1. The most frequent source of infection was urinary 49 (34.8%) followed by respiratory 47 (33.3%) and abdominal 44 (31.2%). All patients had positive cultures. 63 patients (44.68%) had a SOFA > 6 and hospital mortality was 23.4% (33 patients).

### Proteomic study results

Mass spectrometry identified 177 proteins. Of all of them, and by RFE, nine proteins were associated with organ dysfunction (SOFA > 6) with an accuracy of  $0.82 \pm 0.06$ , precision of  $0.85 \pm 0.093$ , sensitivity  $0.81 \pm 0.10$ , specificity  $0.84 \pm 0.10$  and AUC  $0.82 \pm 0.06$ . Twenty-two proteins were associated with mortality with an accuracy of  $0.86 \pm 0.05$ , a precision of  $0.91 \pm 0.05$ , a sensitivity of  $0.91 \pm 0.05$ , a specificity of  $0.72 \pm 0.17$ , and an area under the curve (AUC) of  $0.81 \pm 0.08$  with a confidence interval of 95%. The analyzed proteins are presented in Table 2.

Of the proteins associated with organ dysfunction (p-value = 0.001); two act on complement activation (C1QC and C8a), two on lipoprotein metabolism (APOB and APOC3), three on the inflammatory response (CD14, ORM1 and LYZ), three on the regulation of proteolysis (C1QC, C8a and SERPINF1), six on the innate immune system response (CD14, C1QC, C8a,

**Table 1. Characteristics of the study population.**

| Characteristics                        | Total patients          |
|----------------------------------------|-------------------------|
|                                        | (n = 141)               |
| Male, n (%)                            | 85 (60.3)               |
| Age, year (mean $\pm$ SD)              | 63.82 $\pm$ 15.56       |
| SOFA score, median (25th, 75th)        | 6 (5, 8)                |
| Cardiovascular                         | 3 (1–4)                 |
| Respiratory                            | 2 (1–3)                 |
| Liver                                  | 0 (0–1)                 |
| Coagulation                            | 0 (0–1)                 |
| Renal                                  | 1 (0–2)                 |
| Neurological                           | 0 (0–1)                 |
| SOFA > 6, n (%)                        | 63 (44.68)              |
| Sepsis / Septic shock, n (%)           | 67 (47.5) / 74 (52.5)   |
| Admitted ICU, n (%)                    | 70 (49.6)               |
| Mechanical ventilation, n (%)          | 42 (29.8)               |
| Laboratory findings                    |                         |
| Leucocytes (x10E6), (mean $\pm$ SD)    | 13289.35 $\pm$ 10795.70 |
| Platelets (x10E6), median (25th, 75th) | 175000 (110500, 278500) |
| Lactate (mmol/L), median (25th, 75th)  | 2.6 (1.9, 4.2)          |
| CRP (mg/dL), (mean $\pm$ SD)           | 21.8 $\pm$ 12.5         |
| PCT (ng/mL), median (25th, 75th)       | 6.44 (2.02, 25.2)       |
| Infection source, n (%)                |                         |
| Urinary                                | 49 (34.8)               |
| Respiratory                            | 47 (33.3)               |
| Abdominal                              | 44 (31.2)               |
| Mortality, n (%)                       | 33 (23.4)               |

<https://doi.org/10.1371/journal.pone.0278708.t001>



**Table 2. Proteins analyzed and their relationship with mortality /organ dysfunction.**

| <u>PROTEINS ASSOCIATED TO MORTALITY</u>                                        | <u>PROTEINS ASSOCIATED TO ORGAN DYSFUNCTION</u> |
|--------------------------------------------------------------------------------|-------------------------------------------------|
| CLU- Clusterin                                                                 | GPX3- Glutathione peroxidase 3                  |
| LUM- Lumican                                                                   | APOB- Apolipoprotein B-100                      |
| APOL1- Apolipoprotein L-1                                                      | ORM1- Alpha-1-acid glycoprotein 1               |
| SAA1- Serum amyloid A-1 protein                                                | SERPINF1- Pigment epithelium-derived factor     |
| CLEC3B- Tetranectin                                                            | LYZ- Lysozyme C                                 |
| C8A- Complement component C8 alpha chain                                       | C8A- Complement component C8 alpha chain        |
| ITIH4- Inter-alpha-trypsin inhibitor heavy chain family member 4               | CD14- Monocyte differentiation antigen CD14     |
| KNG1- Kininogen-1                                                              | APOC3- Apolipoprotein C-III                     |
| AGT- Angiotensinogen                                                           | C1QC- Complement C1q subcomponent subunit C     |
| C7- Complement component C7                                                    |                                                 |
| SAA2- Serum amyloid A-2 protein                                                |                                                 |
| APOH- Beta-2-glicoproteína 1                                                   |                                                 |
| HRG- Histidine-rich glycoprotein                                               |                                                 |
| AFM- Afamin                                                                    |                                                 |
| APOE- Apolipoprotein E                                                         |                                                 |
| APOC1- Apolipoprotein C-1                                                      |                                                 |
| C1S- Complement C1s subcomponent                                               |                                                 |
| SERPINC1- Antithrombin-III                                                     |                                                 |
| IGFALS- Insulin-like growth factor-binding protein complex acid labile subunit |                                                 |
| KLKB1- Plasma Kallikrein                                                       |                                                 |
| CFB- Complement Factor B                                                       |                                                 |
| BTD- Biotinidase                                                               |                                                 |

<https://doi.org/10.1371/journal.pone.0278708.t002>

APOB, ORM1 and LYZ) and one has other functions (GPX3). The relationship between these proteins is presented in Fig 1. By applying the SVC model and analyzing their values additively, it was observed that the presence of 7 proteins (GPX3, CD14, APOB, C1QC, SERPINF1, ORM and C8A) had a positive shap value, indicating association with higher organ dysfunction, while two proteins (APOC3 and LYZ) had a negative shap value. The presence of proteins GPX3 (+0.23), CD14 (+0.2) and APOB (+0.06) were associated with high organ dysfunction, while proteins APOC3 (-0.06) and LYZ (-0.03) were associated with lower organ dysfunction. (Fig 2).

Of the proteins associated with mortality (p-value = 0.001), thirteen participate in the regulation of proteolysis (CLEC3B, ITIH4, KLKB1, HRG, KNG1, C8a, SERPINC1, CLU, C7, C1s, AGT, APOE and CFB), nine in the regulation inflammatory response (KLKB1, C8a, CLU, C7, C1s, AGT, APOE, CFB and SAA1), ten in the immune response (HRG, KNG1, APOL1, SERPINC1, C8a, C7, C1s, CLU, CFB and SAA1), five in lipid transport (APOH, APOL1, APOC1, CLU and APOE), five in complement activation (C8a, C7, C1s, CFB and CLU), eight in hemostasis (CLEC3B, ITIH4, KLKB1, HRG, KNG1, APOH, SERPINC1 and CLU) and five fulfill other functions (LUM, IGFALS, AFM, BTD and SAA2). The relationship between these proteins is also presented in Fig 1. Applying the same SVC model and shap value analysis, it was observed that, of these proteins, fifteen of them (SAA1, CFB, SAA2, APOL1, CLEC3B, APOH, LUM, AGT, CLU, ITIHT4, AFM, IGFALS, C8A, SERPINC1 and KLB1), had a positive shap value, indicating high association with lower mortality, while seven proteins (APOE, APOC1, HRG, KNG, C1s, C7 and BTD) had a negative shap value, indicating stronger association with

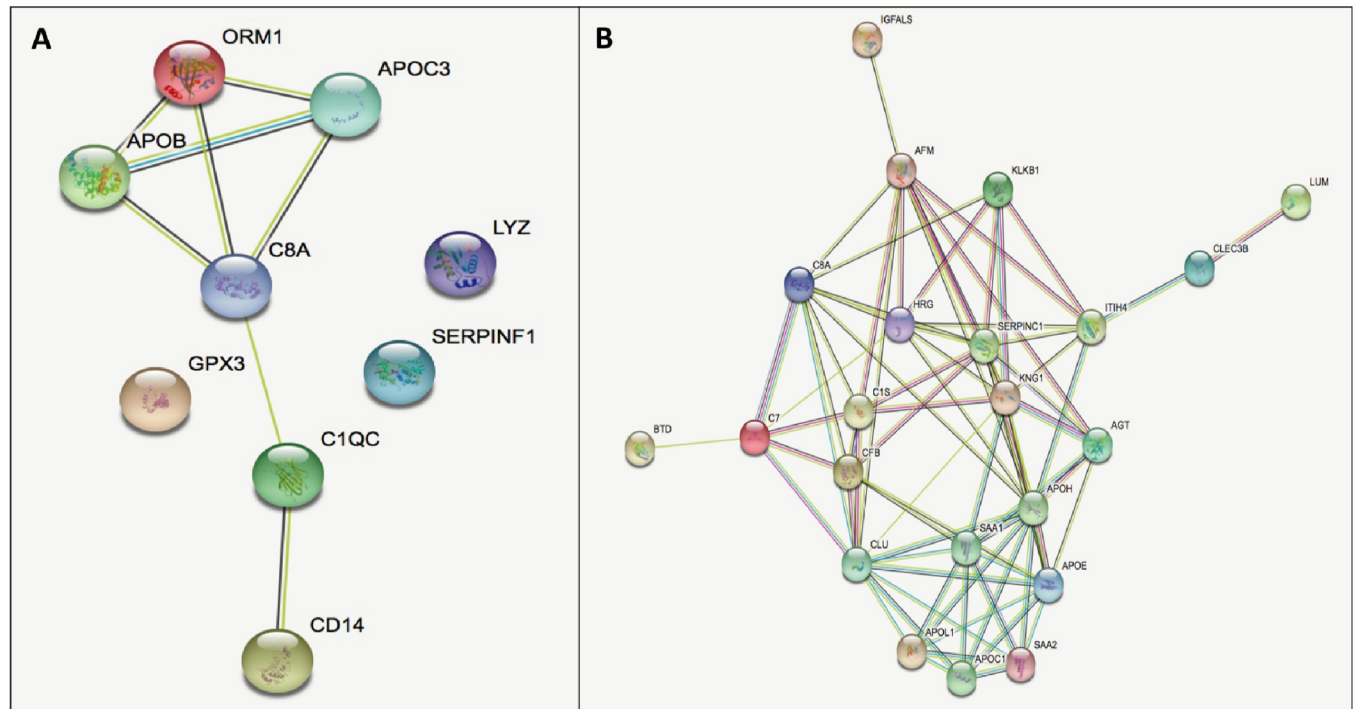

**Fig 1.** Relationship between proteins (strings): A) organ dysfunction, B) Mortality (<https://string-db.org/>).

<https://doi.org/10.1371/journal.pone.0278708.g001>

higher mortality. Likewise, it was observed that the presence of SAA1 (+0.19), CFB (+0.09) and SAA2 (+0.04) proteins were associated with lower mortality while APOE proteins (-0.07), APOC1 (-0.04) and HRG (-0.04) were associated in patients with higher mortality. (Fig 2).

## Discussion

This study demonstrates the existence of proteomic patterns associated with organ dysfunction and sepsis mortality. A set of nine proteins were associated with organ dysfunction, and seven of them were found predominantly in those patients with upper organ dysfunction (SOFA > 6), while two proteins were found in patients with lower organ dysfunction. In addition, a set of twenty-two proteins that may play a role in the mortality of septic patients, of which thirteen proteins are associated with lower mortality while nine of them have a higher expression in non-surviving patients. The presence and predominance of some over others could tip the balance of the result of evolution. In addition, the different proteins observed in this study participate in different physiological metabolic pathways, which represents sepsis as a very complex process in which various biological processes are involved. This is a first step to evaluate the possible prognostic value of these biomarkers and will allow advancing in the therapeutic strategy that will improve the survival of these patients.

Sepsis involves an extensive systemic inflammatory response that causes the release of cytokines and chemokines. In this setting, proteomics provides an analysis of the expression, location, function, and interaction of proteomes. Compared with other immunological tests, proteomics is a novel method that has the advantages of high throughput, sensitivity, and specificity, which is why it has been widely used in various fields of medicine such as oncology, neurology, and hematology [19–21].



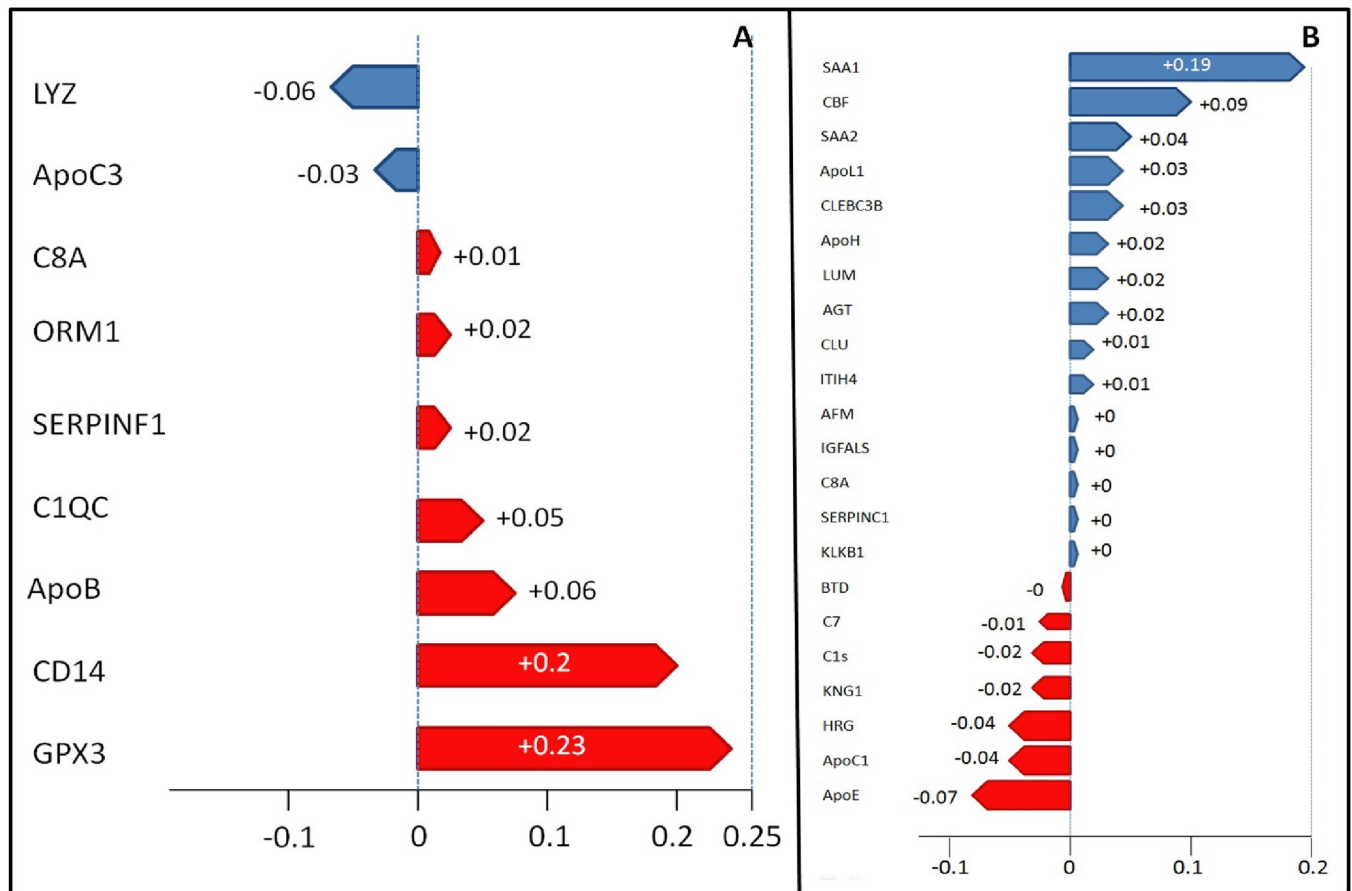

**Fig 2. Shap values graphics.** A) blue = proteins expressed in patients with SOFA  $\leq 6$ , red = proteins expressed in patients with SOFA  $> 6$ . B) blue = proteins expressed in patients survivors, red = proteins expressed in patients non-survivors.

<https://doi.org/10.1371/journal.pone.0278708.g002>

### Apolipoproteins

The role of lipid metabolism in sepsis is well known. Although hypercholesterolemia has been associated with different cardiovascular diseases, hypocholesterolemia has been correlated with the appearance of infections and mortality in older adults [22, 23]. In our study, we show that some apolipoproteins are detrimental in the evolution and outcome of sepsis, while others play the opposite role. In this study we have observed high expression of ApoC3 in patients with less organ dysfunction. ApoC3 acts as the activation of the NLRP3 inflammasome present in human monocytes, which through a complex enzymatic sequence results in the production of interleukin  $1\beta$  that induces pyroptosis, an inflammatory necrotic cell death [24]. A study evaluating changes in serum proteome between sepsis and non-sepsis groups found that a downregulation of ApoC3 presented good discrimination properties between the two study groups. Patients with sepsis had lower ApoC3 expression than non-septic patients [25]. On the contrary, we have observed that ApoB (with a shap value +0.06) was associated with higher organ dysfunction. Kumaraswamy et al, in a study whose objective was to study the association of ApoM with the severity of sepsis, observed that ApoB behaved as an acute negative phase protein. The largest decreases were seen in patients with severe sepsis with shock, followed by the severe sepsis without shock group and non-infectious systemic inflammatory response syndrome. Thus, like our results, the most dramatic decreases were seen in critically ill patients. In addition, they were correlated with lower levels of ApoA1, HDL, and LDL cholesterol [26].

We have also observed that ApoC1 and ApoE had a stronger association with non-surviving patients. In most of the studies carried out, it has been observed that, in septic patients, serum levels of ApoC1 are lower, which perhaps suggests a possible protective effect. ApoC1 has been shown to provide protection against *Klebsiella pneumoniae*-induced pneumonia by increasing the early immune response and preventing lethality in mice [27]. In addition, Sharma et al [28] observed that when comparing septic patients with healthy controls, lipid metabolism was the main altered function with downregulated proteins, such as ApoB, ApoC1 and ApoL1 among others. Contrary to this, in other studies, the measured plasma levels of ApoC1 were positively correlated with the proinflammatory response of patients undergoing extracorporeal circulation and who presented endotoxemia during reperfusion [29]. Therefore, ApoC1 regulates, in a complex way, the activity of the enzymes and receptors involved in the metabolism of VLDL and HDL and, then, the global effect on the plasma lipid profile is the result of a subtle control resulting from multiple effects seemingly opposite.

ApoE is the main apolipoprotein of LDL. In this study, ApoE levels were elevated in septic patients who did not survive. In neurodegeneration studies, the presence of endotoxins from gram-negative bacteria was found to bind directly to ApoE, contributing to neuroinflammation and thus neuronal damage [30]. In a study in rats, in which ApoE was injected serially after cecal ligation and puncture, it was shown that 48 h after injections, septic mortality increased in a dose-dependent manner [31]. Other studies in murine models have observed changes in lipoprotein composition in which ApoA-1 and ApoC-1 are decreased while ApoE levels are increased. These changes in the composition of lipids and apolipoproteins accelerate the terminal catabolism of HDL and, therefore, the appearance of hypocholesterolemia [32, 33]. On the other hand, ApoH has been shown to exert a protective role in sepsis as a scavenger of lipopolysaccharides in Gram negatives [34]. In our study, ApoH has turned out to be a lipoprotein with a protective role in mortality. Schrijver et al [35] observed that ApoH levels were significantly lower in septic patients, especially in patients with septic shock, although they found no significant differences between survivors and non-survivors.

## Proteolysis

Proteolysis is an important process in sepsis. In human and murine experiments, increased proteolysis is associated with organ dysfunction and mortality [36, 37]. Most of the proteins detected, in this study, play an important role in proteolysis and their effects on organ dysfunction and mortality are disparate. The role of antithrombin 3 (SERPIN1) as an inhibitor of serine proteases and its natural anticoagulant effect has been known for decades [38]. It has also been shown to exert anti-inflammatory effects during sepsis [39]. Kuroda et al [40] showed that the administration of recombinant antithrombin 3 in septic patients with significant organ dysfunction improved the results of disseminated vascular coagulation (DIC) and improved the score on the SOFA scale, demonstrating a protective role of this protein. ITIH4 (H4 heavy chain inter-alpha-trypsin inhibitor) has been postulated as a biomarker in sepsis [41]. This protein, along with the rest of the inter-alpha-trypsins, is, like antithrombin 3, a family of serine protease inhibitors of hepatic origin with an important role in inflammation [42]. Furthermore, low levels of ITIH4 have been observed in patients with DIC [43], which means that a decrease in ITIH4 levels induces a procoagulant state that can lead to increased organ dysfunction and mortality. Unlike our study, there are others in which there is a positive correlation between ITIH4 levels and the severity of the infection [44, 45].

CLEC3B or tetranectin (TN) is the one that plays a more important role in our study. This plasma protein is known to be secreted by myeloid cells. Its expression is greater in the lungs, although it is also present in the bloodstream of humans. The biological roles of TN are not

fully understood, although it has been implicated in multiple bone disorders and wound healing [46]. In this study, TN showed a protective effect against mortality. Chen et al [47] found that sepsis patients showed much lower blood levels of TN compared to healthy controls. The authors found that removing tetranectin in mice aggravated severe inflammation, lung damage, and other features of fatal sepsis, but supplementing mice with tetranectin reduced organ damage and amplified the survival. Recently, low levels of histidine-rich glycoprotein (HRG) have been shown to be associated with increased mortality in septic patients, which could be an important prognostic biomarker [48]. In this study, HGR has a strong association with mortality (with a shap value of -0.04), as well as Kininogen1 (KNG1) (-0.02). The role played by KNG1, as a proinflammatory cytokine, in accelerating the inflammatory process is also known [49]. Hu et al [50], in a study on the effects of sulfentanil in sepsis lung injury concluded that this drug can alleviate inflammation and oxidative stress in sepsis-induced acute lung injury by negatively regulating the expression of KNG1.

### Complement

Another group of proteins that plays an important role in sepsis is complement (CS), the main component of the innate immune system against pathogens [51]. In this study, two proteins were associated with organ dysfunction (C1Qc and C8a) having a significant association with higher organ dysfunction and five with mortality, three [Complement Factor B (CFB), clusterin (CLU) and C8a] with a protective role and two (C7, C1s) with a deleterious role. Petersen et al found that patients with deficiencies in components C6, C7 and C8 predisposed to greater meningococcal infection [52]. Keizer et al, contrary to our results, stated that patients with C7 deficiency had less protection after being vaccinated against meningococcus due to lower production of anticapsular antibodies [53]. In upregulation studies in Alzheimer's disease and many therapy-resistant cancers, low CLU levels have also been associated with increased meningococcal infection [54, 55]. CFB works in the alternative pathway to activate and amplify the complement system [56]. A study conducted in mice with septic shock indicated that the absence of CFB conferred a protective effect, with better survival and cardiac function and less markedly attenuated acute kidney injury [57]. In contrast, other studies have indicated that the alternative complement pathway is essential in the fight against infection and is activated in clinical situations of septic shock. Clinical studies showed that the active CFB fragment was significantly increased in patients with septic shock [58, 59]. In our study, a strong association between C1QC and organ dysfunction is evidenced. In a recent study, Li et al [60] found that C1QC levels were significantly reduced in the serum of sepsis patients. This decrease was associated with a high AUC not only with higher mortality, but also with a higher SOFA score with an AUC for sepsis prognosis, higher SOFA and mortality.

### Other proteins

We have observed in our patients other proteins with different functions. Glutathione peroxidase-3 (GPX3) was the protein that presents the strongest association with higher organ dysfunction. This molecule is known as a key selenoprotein with antioxidant properties. Selenium and GPx-3 deficiency have been associated with sepsis [61]. Some authors have observed that early decreases in GPX3 are associated with inflammatory response syndrome (SIRS) and organ dysfunction [62]. Adjuvant treatment of patients with high doses of sodium selenite has even been shown to reduce the mortality rate in patients with severe sepsis or septic shock [63].

We have also observed the important protective role of SAA1 and SAA2 in mortality. But contrary to our results, it has been observed that high levels of these two proteins have been

associated with a greater appearance of sepsis [64] and their downregulation improves intestinal injury in mice [65]. Although the authors have not been able to find the relationship of these proteins with mortality.

### Limitations

This study has several limitations. First of all, only patients with sepsis have been included in this study and it has not been compared with patients with non-infectious systemic inflammatory response syndrome. Therefore, we do not know if the findings can also be observed in this type of patient and not, specifically, in the inflammatory response induced by the infection. Second, the design of this study only allows us to know that the hyperexpression of a protein is associated with organ dysfunction or mortality, but we do not know not only the concentration of each protein, but also the role that this protein plays in each group. In other words, we know that a protein is hyperexpressed, for example in high organ dysfunction, but we do not know if its presence is deleterious or, on the contrary, a compensatory mechanism that tries to counteract said organic dysfunction. A multicenter study should be carried out with more patients in which not only what proteins are related to the described objectives are observed, but also a metabolic study of the same to be able to specify which are positively associated with organ dysfunction and which with the mortality.

### Conclusion

In sepsis there are proteomic patterns associated with organ dysfunction and mortality. Advances in knowledge of the proteins changes associated with organ dysfunction and sepsis mortality may allow the identification of new therapeutic targets in the future.

### Acknowledgments

To Toni del Pino, Rosa Ras and Pol Herrero from the Proteomics and Metabolomics Area of the Center for Omic Sciences (COS), a Joint between Rovira I Virgili University and Eurecat (Reus, Spain), for their contribution to the proteomics analysis. Samples and data from patients included in this study were provided by the Vall d'Hebron University Hospital Biobank (PT20/00107), integrated in the Spanish National Biobanks Network, and they were processed following standard operating procedures with the appropriate approval of the Ethical and Scientific Committees. The authors kindly appreciate the generous donation of samples and clinical data of the donors of the Sepsis Bank of HUVH Biobank.

### Author Contributions

**Conceptualization:** Adolfo Ruiz-Sanmartín, Vicent Ribas, David Suñol, Juan Carlos Ruiz-Rodríguez.

**Data curation:** Adolfo Ruiz-Sanmartín, Vicent Ribas, David Suñol, Juan Carlos Ruiz-Rodríguez.

**Formal analysis:** Adolfo Ruiz-Sanmartín, Vicent Ribas, David Suñol, Núria Canela, Juan Carlos Ruiz-Rodríguez.

**Investigation:** Adolfo Ruiz-Sanmartín, Vicent Ribas, David Suñol, Luis Chiscano-Camón, Clara Palmada, Iván Bajaan, Nieves Larrosa, Juan José González, Núria Canela, Ricard Ferrer, Juan Carlos Ruiz-Rodríguez.

**Methodology:** Adolfo Ruiz-Sanmartín, Vicent Ribas, David Suñol, Núria Canela, Juan Carlos Ruiz-Rodríguez.

**Supervision:** Adolfo Ruiz-Sanmartín, Vicent Ribas, Juan Carlos Ruiz-Rodríguez.

**Validation:** Adolfo Ruiz-Sanmartín, Vicent Ribas, Juan Carlos Ruiz-Rodríguez.

**Visualization:** Adolfo Ruiz-Sanmartín, Vicent Ribas, Juan Carlos Ruiz-Rodríguez.

**Writing – original draft:** Adolfo Ruiz-Sanmartín.

**Writing – review & editing:** Vicent Ribas, Ricard Ferrer, Juan Carlos Ruiz-Rodríguez.

## References

1. Singer M, Deutschman CS, Seymour CW, Shankar-Hari M, Annane D, Bauer M, et al. The third international consensus definitions for sepsis and septic shock (Sepsis-3). *JAMA*. 2016; 315(8):801–10. <https://doi.org/10.1001/jama.2016.0287> PMID: 26903338
2. Yébenes JC, Ruiz-Rodríguez JC, Ferrer R, Clèries M, Bosch A, Lorenzo C et al. Epidemiology of sepsis in Catalonia: analysis of incidence and outcomes in a European setting. *Ann Intensive Care*. 2017 Dec; 7(1):19. <https://doi.org/10.1186/s13613-017-0241-1> PMID: 28220453
3. Bauer M, Gerlach H, Vogelmann T, Preissing F, Stiefel J, Adam D. Mortality in sepsis and septic shock in Europe, North America and Australia between 2009 and 2019- results from a systematic review and meta-analysis. *Crit Care*. 2020 May 19; 24(1):239. <https://doi.org/10.1186/s13054-020-02950-2> PMID: 32430052
4. Lobo SM, Lobo FR, Bota DP, Lopes-Ferreira F, Soliman HM, Mélot C et al. C-reactive protein levels correlate with mortality and organ failure in critically ill patients. *Chest*. 2003; 123(6):2043–49. <https://doi.org/10.1378/chest.123.6.2043> PMID: 12796187
5. Song J, Park DW, Moon S, Cho HJ, Park JH, Seok H, et al. Diagnostic and prognostic value of interleukin-6, pentraxin 3 and procalcitonin levels among sepsis and septic shock patients: a prospective controlled study according to the Sepsis-3 definitions. *BMC Infect Dis*. 2019 Nov 12; 19(1):968.
6. Klein HJ, Buehel PK, Niggemann P, Rittirsch D, Schweizer R, Waldner M, et al. Expression of pancreatic stone protein is unaffected by trauma and subsequent surgery in burn patients. *World J Surg*. 2020 Sep; 44(9):3000–9 <https://doi.org/10.1007/s00268-020-05589-w> PMID: 32451625
7. Lu J, Xu BB, Xue Z, Xie JW, Zheng CH, Huang CM, et al. Perioperative CRP. A novel inflammation-based classification in gastric cancer for recurrence and chemotherapy benefit. *Cancer Med*. 2021 Jan; 10(1):34–44
8. Kumari N, Dwarakanath BS, Das A, Bhatt AN. Role of interleukine-6 in cancer progression and therapeutic resistance. *Tumor Biol*. 2016. Sep; 37(9):11553–72.
9. Ruiz-Rodríguez JC, Caballero J, Ruiz-Sanmartin A, Ribas VJ, Pérez M, Bóveda JL et al. Usefulness of procalcitonin clearance as a prognostic biomarker in septic shock. A prospective pilot study. *Med Intensiva*. 2012 Oct; 36(7):475–80. <https://doi.org/10.1016/j.medin.2011.11.024> PMID: 22257436
10. Wirz Y, Meier MA, Bouadma L, Luyt CE, Wolff M, Chastre J et al. Effect of procalcitonin-guided antibiotic treatment on clinical outcomes in intensive care unit patients with infection and sepsis patients: a patient-level meta-analysis of randomized trials. *Crit Care*. 2018 Aug 15; 22(1):191. <https://doi.org/10.1186/s13054-018-2125-7> PMID: 30111341
11. Becker KL, Snider R, Nylén ES. Procalcitonin assay in systemic inflammation, infection, and sepsis: clinical utility and limitations. *Crit Care Med*. 2008 Mar; 36(3):941–52. <https://doi.org/10.1097/CCM.0B013E318165BABB> PMID: 18431284
12. Becker KL, Snider R, Nylén ES. Procalcitonin in sepsis and systemic inflammation: a harmful biomarker and a therapeutic target. *Br J Pharmacol*. 2010; 159:253–64. <https://doi.org/10.1111/j.1476-5381.2009.00433.x> PMID: 20002097
13. Memar MY, Baghi HB. Presepsin: A promising biomarker for the detection of bacterial infections. *Biomed Pharmacother*. 2019 Mar; 111:649–656. <https://doi.org/10.1016/j.biopha.2018.12.124> PMID: 30611989
14. Baldirà J, Ruiz-Rodríguez JC, Wilson DC, Ruiz-Sanmartin A, Cortes A, Chiscano L et al. Biomarkers and clinical scores to aid the identification of disease severity and intensive care requirement following activation of an in-hospital sepsis code. *Ann Intensive Care*. 2020 Jan 15; 10(1):7. <https://doi.org/10.1186/s13613-020-0625-5> PMID: 31940096
15. List EO, Berryman DE, Bower B, Sackmann-Sala L, Gosney E, Ding J et al. The use of proteomics to study infectious diseases. *Infect Disord Drug Targets*. 2008; 8:31–45. <https://doi.org/10.2174/187152608784139640> PMID: 18473905



16. Marx D, Metzger J, Pejchinovski M, Gil RB, Frantzi M, Latosinska A et al. Proteomics and metabolomics for AKI diagnosis. *Semin Nephrol.* 2018 Jan; 38(1):63–87. <https://doi.org/10.1016/j.semnephrol.2017.09.007> PMID: 29291763
17. Ferrer R, Ruiz-Rodríguez JC, Larrosa N, Llaneras J, Molas E, González-López JJ. Sepsis code implementation at Vall d'Hebron university hospital: rapid diagnostics key to success. *ICU Manag Pract.* 2017; 17 (4):214–215.
18. Levy MM, Fink MP, Marshall JC, Abraham E, Angus D, Cook D, et al; International Sepsis Definitions Conference. 2001 SCCM/ESICM/ACCP/ATS/SIS International Sepsis Definitions Conference. *Intensive Care Med.* 2003 Apr; 29(4):530–8.
19. Chauvin A, François-Michel Boisvert. Proteomics Analysis of Colorectal Cancer Cells. *Methods Mol Biol.* 2018; 1765:155–166.
20. Marcus K, Schmidt O, Schaefer H, Hamacher M, van Hall A, Meyer HE. Proteomics—application to the brain. *Int Rev Neurobiol.* 2004; 61:285–311. [https://doi.org/10.1016/S0074-7742\(04\)61011-7](https://doi.org/10.1016/S0074-7742(04)61011-7) PMID: 15482819
21. Raffel S, Klimmeck D, Falcone M, Demir A, Pouya A, Zeisberger P et al. Quantitative proteomics reveals specific metabolic features of acute myeloid leukemia stem cells. *Blood.* 2020 Sep 24; 136(13):1507–1519. <https://doi.org/10.1182/blood.2019003654> PMID: 32556243
22. Contreras-Duarte S, Varas P, Awad F, Busso D, Rigotti A. Protective role of high density lipoproteins in sepsis: basic issues and clinical implications. *Rev Chilena Infectol.* 2014 Feb; 31(1):34–43.
23. Iribarren C, Jacobs DR Jr, Sidney S, Claxton AJ, Gross MD, Sadler M et al. Serum total cholesterol and risk of hospitalization, and death from respiratory disease. *Int J Epidemiol.* 1997; 26:1191–202. <https://doi.org/10.1093/ije/26.6.1191> PMID: 9447398
24. Latz E, Xiao TS, Stutz A. Activation and regulation of the inflammasomes. *Nat Rev Immunol.* 2013; 13:397–411. <https://doi.org/10.1038/nri3452> PMID: 23702978
25. Li M, Ren R, Yan M, Chen S, Chen C, Yan J. Identification of novel biomarkers for sepsis diagnosis via serum proteomic analysis using iTRAQ-2D-LC-MS/MS. *J Clin Lab Anal.* 2022 Jan; 36(1):e24142. <https://doi.org/10.1002/jcla.24142> PMID: 34825737
26. Kumaraswamy SB, Linder A, Åkesson P, Dahlbäck B. Decreased plasma concentrations of apolipoprotein M in sepsis and systemic inflammatory response syndromes. *Crit Care.* 2012 Dec 12; 16(2):R60. <https://doi.org/10.1186/cc11305> PMID: 22512779
27. Berbee JF, van der Hoogt CC, Kleemann R, Schippers EF, Kitchens RL, van Dissel JT et al. Apolipoprotein C1 stimulates the response to lipopolysaccharide and reduces mortality in gram-negative sepsis. *FASEB J.* 2006 Oct; 20(12):2162–2164. <https://doi.org/10.1096/fj.05-5639fje> PMID: 16935938
28. Sharma NK, Ferreira BL, Tashima AK, Brunialti MKC, Torquato RJS, Bafi A et al. Lipid metabolism impairment in patients with sepsis secondary to hospital acquired pneumonia, a proteomic analysis. *Clin. Proteomics* 2019 Jul 16; 16:29. <https://doi.org/10.1186/s12014-019-9252-2> PMID: 31341447
29. Schippers EF, Berbee JF, van Disseldorp IM, Versteegh MI, Havekes LM, Rensen PC et al. Preoperative apolipoprotein C1 levels correlate positively with the proinflammatory response in patients experiencing endotoxemia following elective cardiac surgery. *Intensive Care Med.* 2008 Aug; 34(8):1492–1497.
30. Brown GC. The endotoxin hypothesis of neurodegeneration. *J Neuroinflammation.* 2019 Sep 13; 16(1):180. <https://doi.org/10.1186/s12974-019-1564-7> PMID: 31519175
31. Kattan OM, Kasravi FB, Elford EL, Schell MT, Harris HW. Apolipoprotein E-mediated immune regulation in sepsis. *J Immunol.* 2008 Jul 15; 181(2):1399–408. <https://doi.org/10.4049/jimmunol.181.2.1399> PMID: 18606694
32. Barlage S, Fröhlich D, Böttcher A, Jauhiainen M, Müller HP, Noetzel F. ApoE-containing high density lipoproteins and phospholipid transfer protein activity increase in patients with a systemic inflammatory response. *J Lipid Res.* 2001; 42:281–90.
33. Cabana VG, Siegel JN, Sabesin SM. Effects of the acute phase response on the concentration and density distribution of plasma lipids and apolipoproteins. *J Lipid Res.* 1989; 30:39–49. PMID: 2493057
34. Agar C, de Groot PG, Mörgelin M, Monk SD, van Os G, Levels JH et al.  $\beta_2$ -glycoprotein I: a novel component of innate immunity. *Blood.* 2011 Jun 23; 117(25):6939–47.
35. Schrijver I, Kemperman H, Roest M, Kesecioglu J, de Lange DW. Beta-2-glycoprotein I as a biomarker for sepsis in critically ill patients in the intensive care unit: a prospective cohort study. *Crit Care.* 2020 Jun 15; 24(1):341. <https://doi.org/10.1186/s13054-020-03066-3> PMID: 32539745
36. Santamaria MH, Aletti F, Li JB, Tan A, Chang M, Leon J et al. Enteral tranexamic acid attenuates vasopressor resistance and changes in  $\alpha_1$ -adrenergic receptor expression in hemorrhagic shock. *J Trauma Acute Care Surg.* 2017 Aug; 83(2):263–270.



37. Bauzá-Martínez J, Aletti F, Pinto BB, Ribas V, Odena MA, Díaz R et al. Proteolysis in septic shock patients: plasma peptidomic patterns are associated with mortality. *Br J Anaesth*. 2018 Nov; 121(5):1065–1074. <https://doi.org/10.1016/j.bja.2018.05.072> PMID: 30336851
38. Fritz H, Jochum M, Geiger R, Duswald KH, Dittmer H, Kortmann H et al. Granulocyte proteinases as mediators of unspecific proteolysis in inflammation: a review. *Folia Histochem Cytobiol*. 1986; 24(2):99–115. PMID: 3533655
39. Wiedermann CJ. Clinical review: molecular mechanisms underlying the role of antithrombin in sepsis. *Crit Care*. 2006; 10(1):209. <https://doi.org/10.1186/cc4822> PMID: 16542481
40. Kuroda H, Masuda Y. Comparison of Protective Effects of Recombinant Antithrombin Gamma and Plasma-Derived Antithrombin on Sepsis-Induced Disseminated Intravascular Coagulation and Multiple Organ Failure. *Clin Appl Thromb Hemost*. Jan-Dec 2020; 26:1076029620981630. <https://doi.org/10.1177/1076029620981630> PMID: 33332196
41. Ma Y, Li R, Wang J, Jiang W, Yuan X, Cui J et al. ITIH4, as an inflammation biomarker, mainly increases in bacterial bloodstream infection. *Cytokine*. 2021 Feb; 138:155377. <https://doi.org/10.1016/j.cyto.2020.155377> PMID: 33348064
42. Cubedo J, Padró T, Formiga F, Ferrer A, Padrós G, Peña E et al. Inflammation and hemostasis in older octogenarians: implication in 5-year survival. *Transl Res*. 2017 Jul; 185:34–46.e9. <https://doi.org/10.1016/j.trsl.2017.04.003> PMID: 28506697
43. Ishizaki T, Hashizume K, Matsubara F, Tsukuda K, Hattori K, Migita S. Inter-alpha-trypsin inhibitor: as a probable component pertaining to disseminated intravascular coagulation (DIC). *Nihon Ketsueki Gakkai Zasshi*. 1980; 43:587–92.
44. Hirvonen J, Pyörälä S, Jousimies-Somer H. Acute phase response in heifers with experimentally induced mastitis. *J. Dairy Res*. 1996; 63:351–360. <https://doi.org/10.1017/s0022029900031873> PMID: 8864931
45. Bao J, Ma Y, Ding M, Wang C, Du G, Zhou Y et al. Preliminary exploration on the serum biomarkers of bloodstream infection with carbapenem-resistant *Klebsiella pneumoniae* based on mass spectrometry. *J Clin Lab Anal*. 2021 Sep; 35(9):e23915. <https://doi.org/10.1002/jcla.23915> PMID: 34331328
46. Paterson CW, Ford ML, Coopersmith CM. Breaking the bond between tetranectin and HMGB1 in sepsis. *Sci Transl Med*. 2020 Apr 15; 12(539):eabb2575. <https://doi.org/10.1126/scitranslmed.abb2575> PMID: 32295899
47. Chen W, Qiang X, Wang Y, Zhu S, Li J, Babaev A et al. Identification of tetranectin-targeting monoclonal antibodies to treat potentially lethal sepsis. *Sci Transl Med*. 2020 Apr 15; 12(539):eaaz3833. <https://doi.org/10.1126/scitranslmed.aaz3833> PMID: 32295901
48. Kuroda K, Ishii K, Mihara Y, Kawanoue N, Wake H, Mori S et al. Histidine-rich glycoprotein as a prognostic biomarker for sepsis. *Sci Rep*. 2021 May 13; 11(1):10223. <https://doi.org/10.1038/s41598-021-89555-z> PMID: 33986340
49. Wu D, Huo M, Chen X, Zhang Y, Qiao Y. Mechanism of tanshinones and phenolic acids from Danshen in the treatment of coronary heart disease based on co-expression network. *BMC Complement Med Ther*. 2020; 20:28. <https://doi.org/10.1186/s12906-019-2712-4> PMID: 32020855
50. Hu Q, Wang Q, Han C, Yang Y. Sufentanil attenuates inflammation and oxidative stress in sepsis-induced acute lung injury by downregulating KNG1 expression. *Mol Med Rep*. 2020 Nov; 22(5):4298–4306. <https://doi.org/10.3892/mmr.2020.11526> PMID: 33000200
51. Charchafieh J, Rushbrook J, Worah S, Zhang M. Activated Complement Factors as Disease Markers for Sepsis. *Dis Markers*. 2015; 2015:382463.
52. Petersen BH, Lee TJ, Snyderman R, Brooks GF. *Neisseria meningitidis* and *Neisseria gonorrhoeae* bacteremia associated with C6, C7, or C8 deficiency. *Ann Intern Med*. 1979 Jun; 90(6):917–20. <https://doi.org/10.7326/0003-4819-90-6-917> PMID: 109025
53. Keiser PB, Broderick M. Meningococcal polysaccharide vaccine failure in a patient with C7 deficiency and a decreased anti-capsular antibody response. *Hum Vaccin Immunother*. 2012 May; 8(5):582–6. <https://doi.org/10.4161/hv.19517> PMID: 22634438
54. Wilson MR, Zoubeidi A. Clusterin as a therapeutic target. *Expert Opin Ther Targets*. 2017 Feb; 21(2):201–213.
55. Høgåsen K, Mollnes TE, Brandtzaeg P. Low levels of vitronectin and clusterin in acute meningococcal disease are closely associated with formation of the terminal-complement complex and the vitronectin-thrombin-antithrombin complex. *Infect Immun*. 1994 Nov; 62(11):4874–80.
56. Ricklin D, Hajishengallis G, Yang K, Lambris JD. Complement: a key system for immune surveillance and homeostasis. *Nat Immunol*. 2010 Sep; 11(9):785–97. <https://doi.org/10.1038/ni.1923> PMID: 20720586

57. Zou L, Feng Y, Li Y, Zhang M, Chen C, Cai J et al. Complement factor B is the downstream effector of TLRs and plays an important role in a mouse model of severe sepsis. *J Immunol*. 2013 Dec 1; 191(11):5625–35. <https://doi.org/10.4049/jimmunol.1301903> PMID: 24154627
58. Lin RY, Astiz ME, Saxon JC, Saha DC, Rackow EC. Alterations in C3, C4, factor B, and related metabolites in septic shock. *Clin Immunol Immunopathol*. 1993 Nov; 69(2):136–42. <https://doi.org/10.1006/clin.1993.1161> PMID: 8403550
59. Brandtzaeg P, Høgåsen K, Kierulf P, Mollnes TE. The excessive complement activation in fulminant meningococcal septicemia is predominantly caused by alternative pathway activation. *J Infect Dis*. 1996 Mar; 173(3):647–55. <https://doi.org/10.1093/infdis/173.3.647> PMID: 8627028
60. Li H, Chen J, Hu Y, Cai X, Tang D, Zhang P. Serum C1q Levels Have Prognostic Value for Sepsis and are Related to the Severity of Sepsis and Organ Damage. *J Inflamm Res*. 2021 Sep 10; 14:4589–4600. <https://doi.org/10.2147/JIR.S322391> PMID: 34531674
61. Forceville X. Selenium and the "free" electron. Selenium—a trace to be followed in septic or inflammatory ICU patients?. *Intensive Care Med*. 2001 Jan; 27(1):16–8. <https://doi.org/10.1007/s001340000779> PMID: 11280628
62. Manzanares W, Biestro A, Galusso F, Torre MH, Mañay N, Pittini G et al. Serum selenium and glutathione peroxidase-3 activity: biomarkers of systemic inflammation in the critically ill? *Intensive Care Med*. 2009 May; 35(5):882–9. <https://doi.org/10.1007/s00134-008-1356-5> PMID: 19034425
63. Angstwurm MW, Engelmann L, Zimmermann T, Lehmann C, Spes CH, Abel P et al. Selenium in Intensive Care (SIC): results of a prospective randomized, placebo-controlled, multiple-center study in patients with severe systemic inflammatory response syndrome, sepsis, and septic shock. *Crit Care Med*. 2007 Jan; 35(1):118–26. <https://doi.org/10.1097/01.CCM.0000251124.83436.0E> PMID: 17095947
64. Thavarajah T, dos Santos CC, Slutsky AS, Marshall JC, Bowden P, Romaschin A et al. The plasma peptides of sepsis. *Clin Proteomics*. 2020 Jul 2; 17:26. <https://doi.org/10.1186/s12014-020-09288-5> PMID: 32636717
65. Jiang Y, Bian Y, Lian N, Wang Y, Xie K, Qin C et al. iTRAQ-Based Quantitative Proteomic Analysis of Intestines in Murine Polymicrobial Sepsis with Hydrogen Gas Treatment. *Drug Des Devel Ther*. 2020 Nov 12; 14:4885–4900. <https://doi.org/10.2147/DDDT.S271191> PMID: 33209018
